# Supplementary material
Source: PubMed Central journal article supplement (PMC2665920)
Supplement: NIHMS103279-supplement-1_si_001.pdf [file NIHMS103279-supplement-1_si_001.pdf]

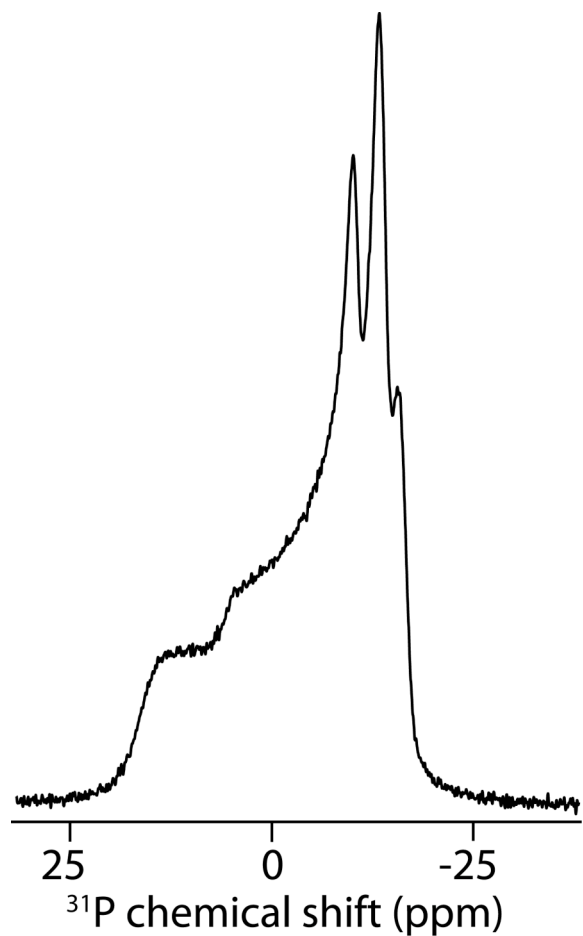

**Figure S1.** The  $^{31}\text{P}$  NMR spectrum of the hIAPP<sub>1-19</sub> bicelle sample. In contrast to the rIAPP<sub>1-19</sub> and rIAPP<sub>1-37</sub> samples, hIAPP<sub>1-19</sub> bicelles do not align well as shown by the span of the  $^{31}\text{P}$  chemical shift.
